# Supplementary material
Source: MDPI journal article supplement (https://www.mdpi.com/2673-4591/10/1/73)

**Georgia  
Tech**

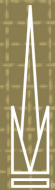

CREATING THE NEXT

# Soft, wearable, digital stethoscope for continuous cardiac biometric security

Georgia Institute of Technology

Sung Hoon Lee, Yun-Soung Kim, Woon-Hong Yeo\*

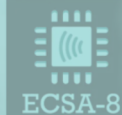

The 8th International Electronic Conference on  
Sensors and Applications  
01-15 NOVEMBER 2021 | ONLINE

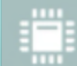

*sensors*

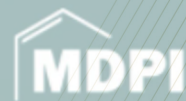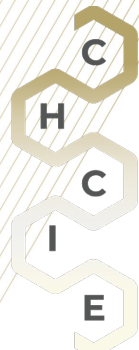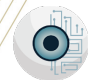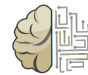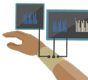

# Applications in the Project

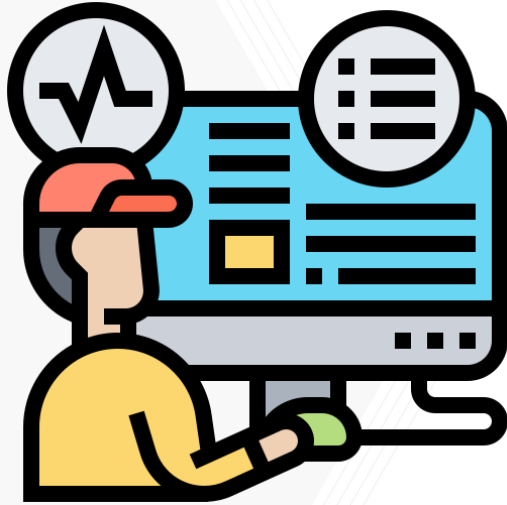

Continuous Monitoring

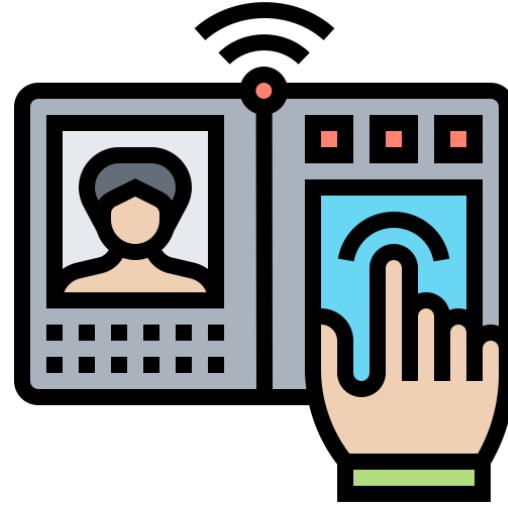

Biometric

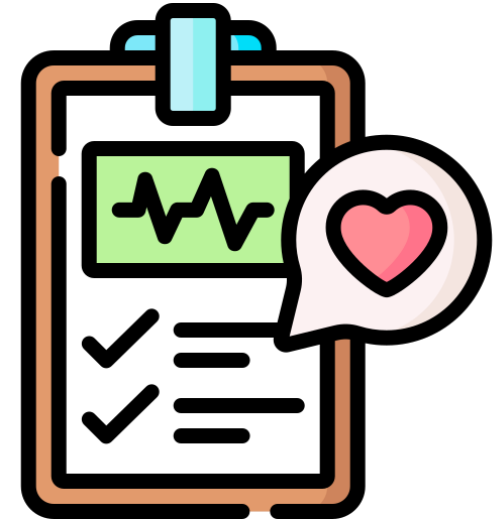

Disease Diagnosis

# Current Biometrics Used

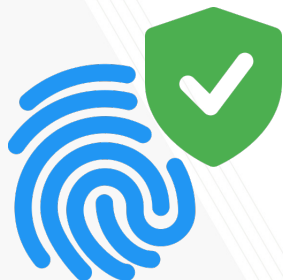

Fingerprint

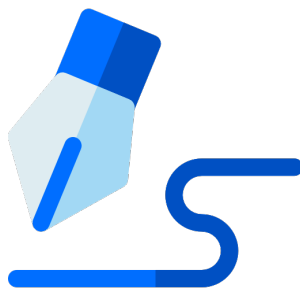

Signature

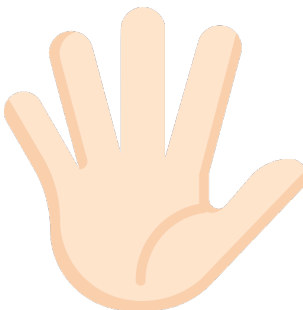

Hand geometry/  
Palm veins

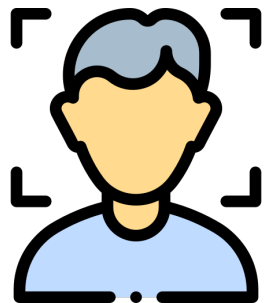

Face geometry

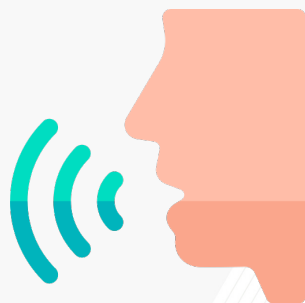

Voice

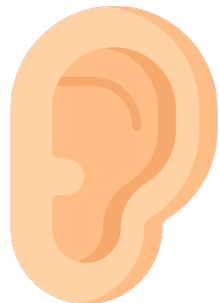

Ear Shape

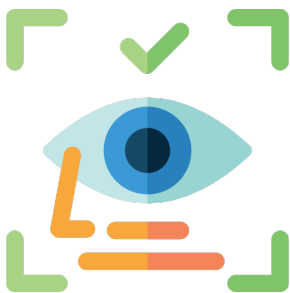

Retina/Iris

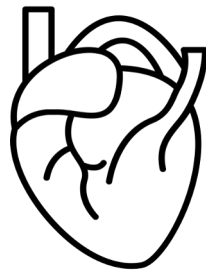

Cardiac Sounds

# Limitations of Current Biometrics

- **Accurate** but **existent error rates**
- **Bulky** and **expensive** sensors for biometrics
- **Not possible** of **continuously authenticate**
- **Cross contamination**

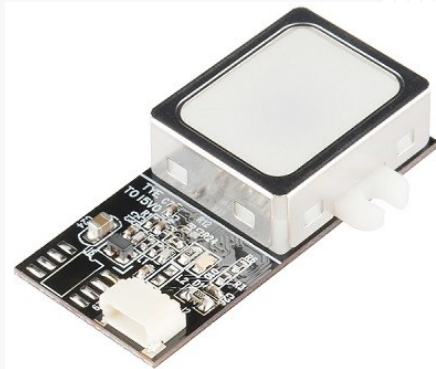

Fingerprint

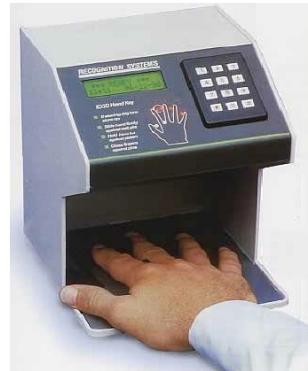

Hand  
Geometry

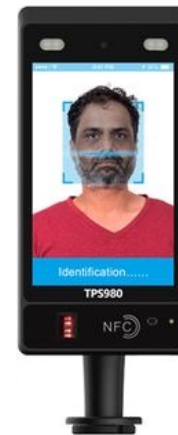

Face

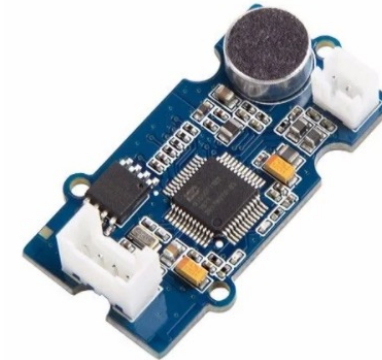

Voice

# Advances in Soft Wearable Biometric

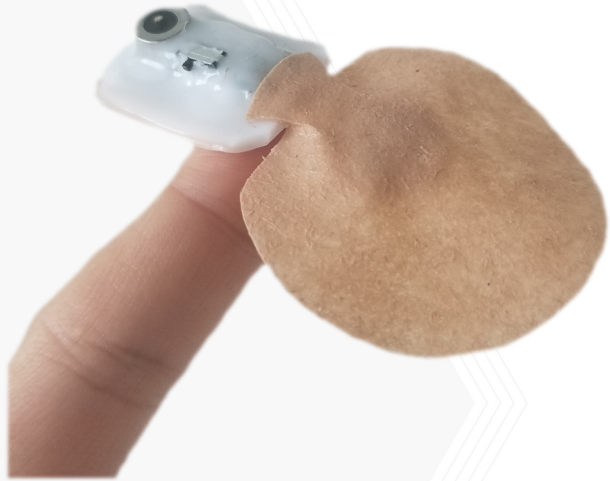

- **Detect & transmit** body sounds
- **Remote and continuous** authentication
- **Accurately receive and store** signals
- **Small, light-weight, flexible** electronic

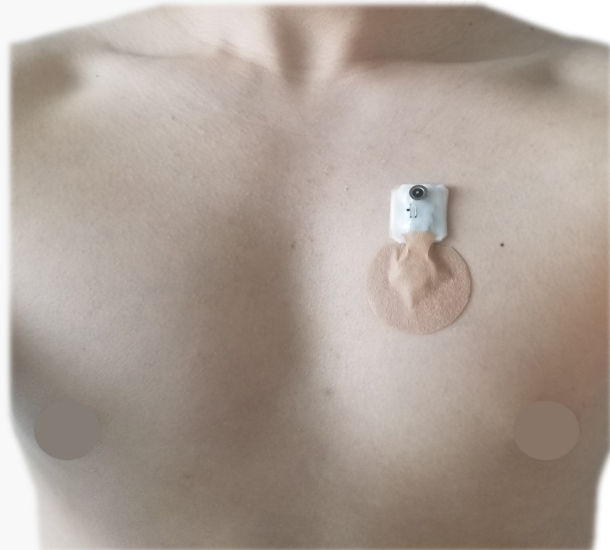

Less than **\$5** per patch!

# Signal Processing Stages

- **Bandpass Filter** – Filtering out unwanted signals and noise
- **Zero-phase filter**
  - Kaiser Window - **better sidelobe amplitude**
  - Low-pass FIR - **minimize round of noise error**

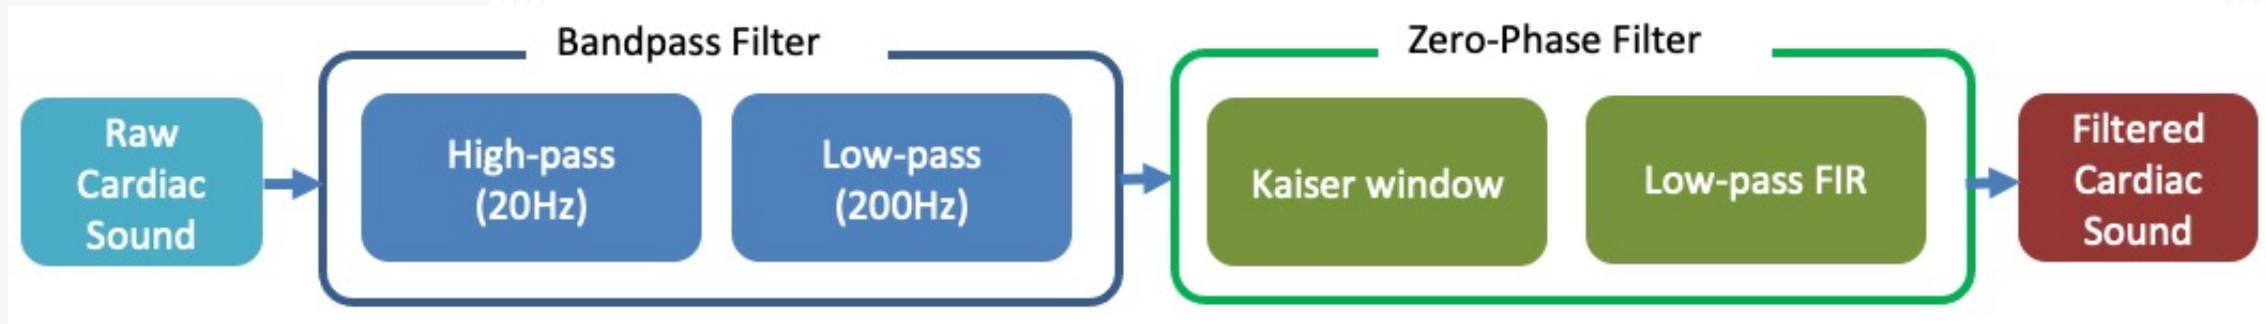

# Signal Processing

- Feature extracted heart sounds (Each participant distinct)

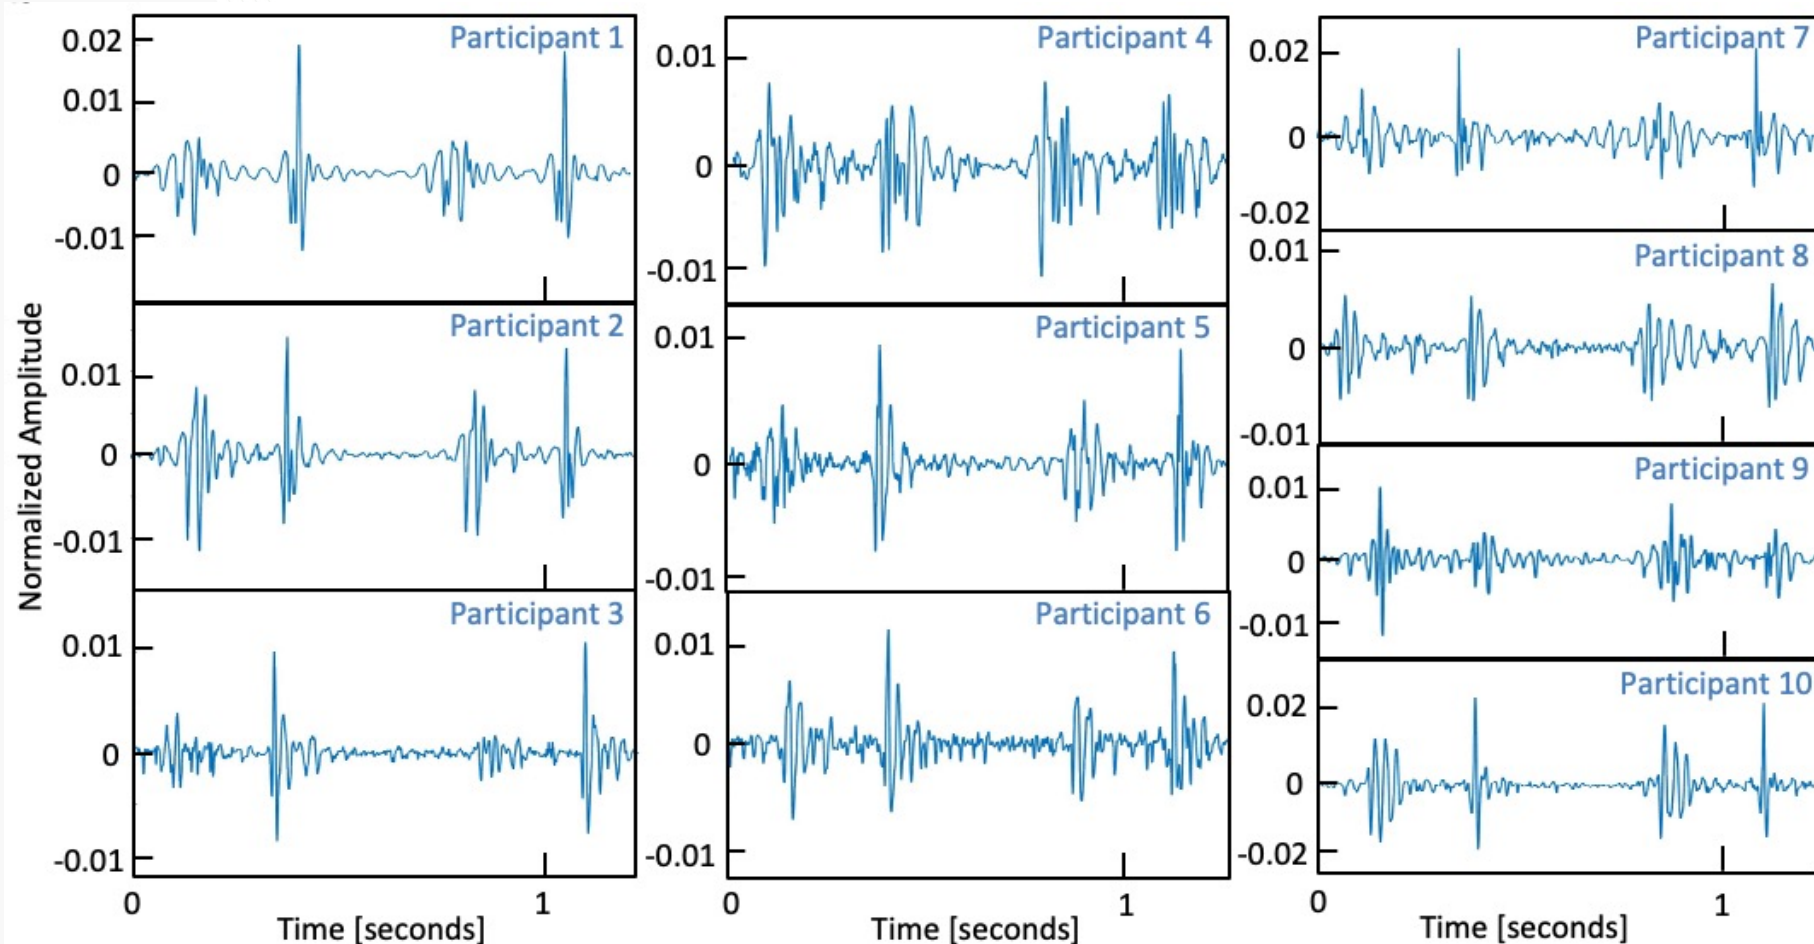

# Machine Learning Stages

- **0.5 second to 2 second window for multiple samples**
- Fast Fourier Transform (FFT)
- Rescaling – Normalizing in the window from 0 to 1
- Convolution 2D Layer
- Max pooling Layer
- Constructing support vectors
- Outputting softmax of 10 classes

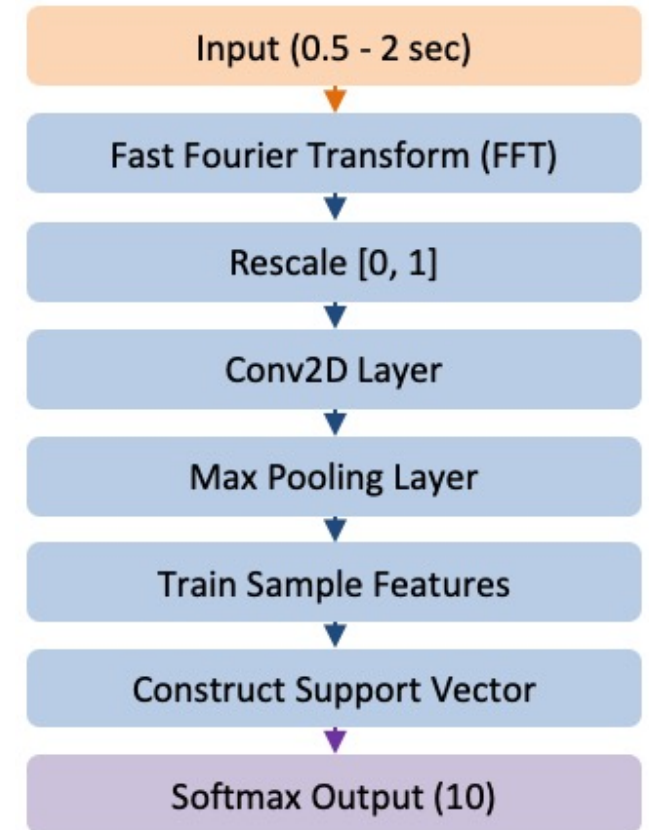



# Machine Learning Results

- Cardiac Biometric Correction Rate (CRR) – **98.3%**
- Exceeding performance compared to Fingerprint, Signature recognition, Voice recognition
- Room for improvement on the accuracy of Iris/Retina scan

|                    |    | Participant Number |        |        |       |       |       |        |        |        |        |
|--------------------|----|--------------------|--------|--------|-------|-------|-------|--------|--------|--------|--------|
|                    |    | 1                  | 2      | 3      | 4     | 5     | 6     | 7      | 8      | 9      | 10     |
| Participant Number | 1  | 91.1%              | 0.0%   | 0.0%   | 0.0%  | 0.0%  | 0.0%  | 0.0%   | 0.0%   | 0.0%   | 0.0%   |
|                    | 2  | 0.0%               | 100.0% | 0.0%   | 0.0%  | 0.0%  | 0.0%  | 0.0%   | 0.0%   | 0.0%   | 0.0%   |
|                    | 3  | 0.0%               | 0.0%   | 100.0% | 0.0%  | 0.0%  | 0.0%  | 0.0%   | 0.0%   | 0.0%   | 0.0%   |
|                    | 4  | 0.0%               | 0.0%   | 0.0%   | 99.8% | 0.0%  | 0.0%  | 0.0%   | 0.0%   | 0.0%   | 0.0%   |
|                    | 5  | 0.0%               | 0.0%   | 0.0%   | 0.0%  | 95.4% | 0.0%  | 0.0%   | 0.0%   | 0.0%   | 0.0%   |
|                    | 6  | 0.0%               | 0.0%   | 0.0%   | 0.2%  | 4.6%  | 99.4% | 0.0%   | 0.0%   | 0.0%   | 0.0%   |
|                    | 7  | 0.0%               | 0.0%   | 0.0%   | 0.0%  | 0.0%  | 0.0%  | 100.0% | 0.0%   | 0.0%   | 0.0%   |
|                    | 8  | 8.9%               | 0.0%   | 0.0%   | 0.0%  | 0.0%  | 0.6%  | 0.0%   | 100.0% | 0.0%   | 0.0%   |
|                    | 9  | 0.0%               | 0.0%   | 0.0%   | 0.0%  | 0.0%  | 0.0%  | 0.0%   | 0.0%   | 100.0% | 0.0%   |
|                    | 10 | 0.0%               | 0.0%   | 0.0%   | 0.0%  | 0.0%  | 0.0%  | 0.0%   | 0.0%   | 0.0%   | 100.0% |

Accuracy: **98.27%**

# Summary

## Traditional

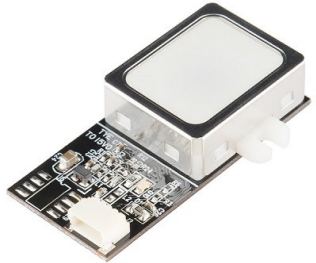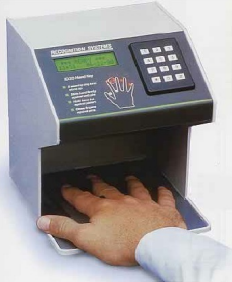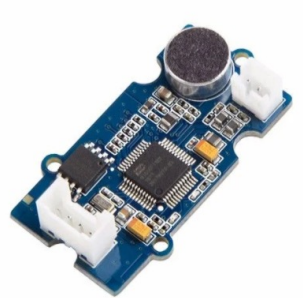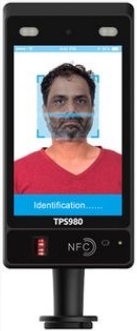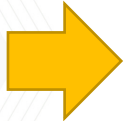

## Today

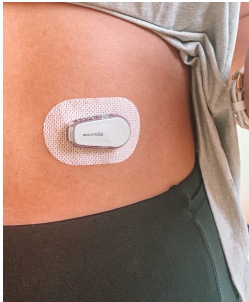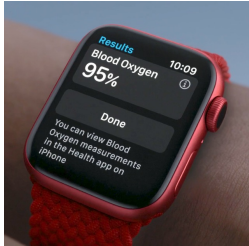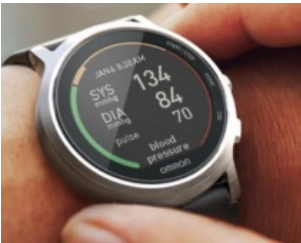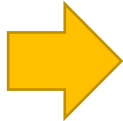

## Next Generation

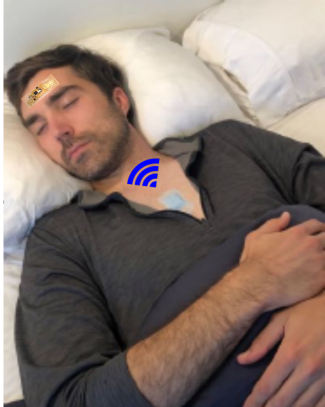

2FA:

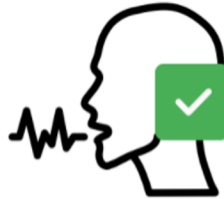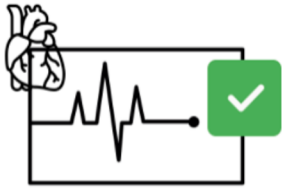

# Acknowledgement

**Bio-Interfaced Translational Nanoengineering Group**  
PI: Professor Woon-Hong Yeo

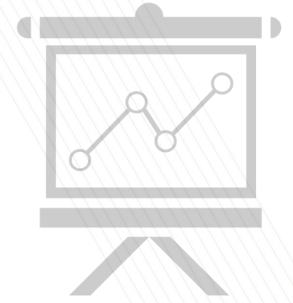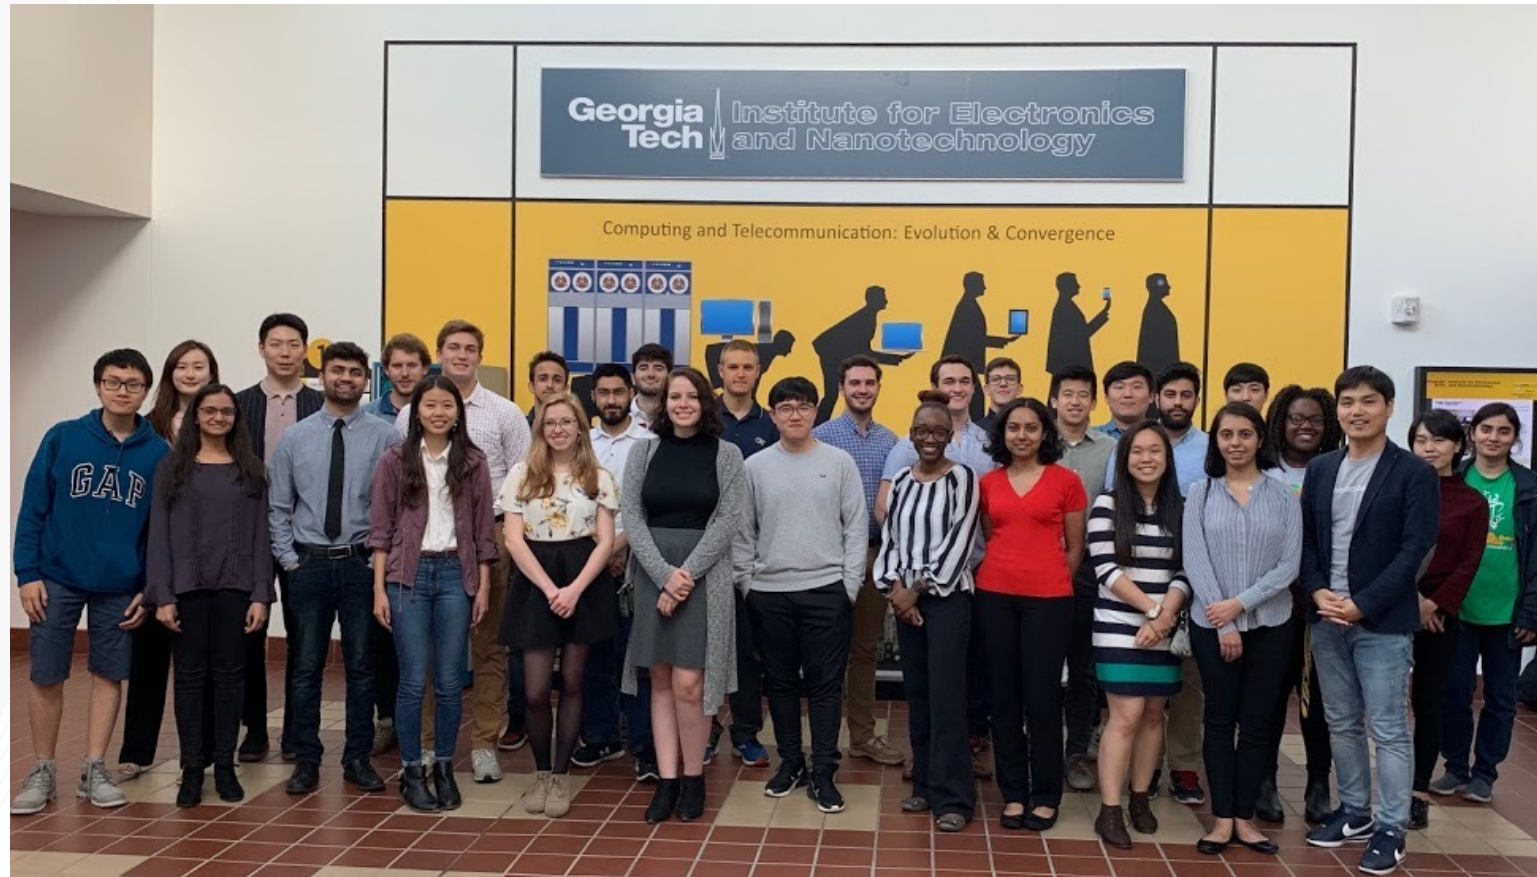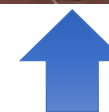

# Thank you!

- **Speaker contact info**

- **Sung Hoon Lee**

- **Email: [slee870@gatech.edu](mailto:slee870@gatech.edu)**

- **Yeo Research Group**

- **Website: [yeolab.gatech.edu](http://yeolab.gatech.edu)**

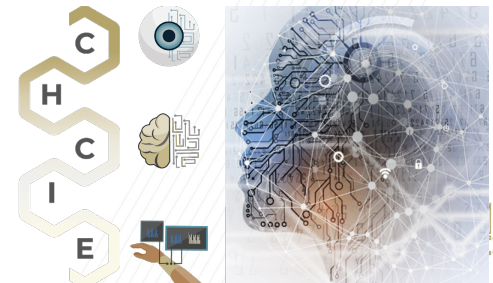

Supplement: s1 [file s1]
